# Supplementary material for: AltiMaP: altimetry mapping procedure for hydrography data
Source: Copernicus journal article supplement (doi:10.5194/essd-16-75-2024), 2024-01-08
Supplement: Supplementary file 1 [file essd-16-75-2024-supplement.pdf]

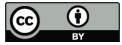

*Supplement of*

## **AltiMaP: altimetry mapping procedure for hydrography data**

**Menaka Revel et al.**

*Correspondence to:* Menaka Revel ([menaka@rainbow.iis.u-tokyo.ac.jp](mailto:menaka@rainbow.iis.u-tokyo.ac.jp))

The copyright of individual parts of the supplement might differ from the article licence.

**Text S1: WSE calculation in CaMa-Flood**

In CaMa-Flood hydrodynamic model the WSE is diagnosed using following equation.

$$WSE = d + z - b \tag{S1}$$

5 Where  $d$  is the river water depth,  $z$  is the riverbank height, and  $b$  is the river channel depth. Hence river bathymetry would be  $(z - b)$ .  $z$  values were obtained from MERIT DEM. Because of river bottom elevation data are not readily available, a power-law relationship was employed to estimate the river channel depth (Yamazaki *et al.*, 2011; Zhou *et al.*, 2022), as shown below.

$$b = \max(b_{min}, c_b Q_{avg}^{p_b}) \tag{S2}$$

10 where  $b$  is the channel depth (m) and  $Q_{avg}$  is the annual average discharge ( $m^3/s$ ). Here, the average climatological land surface runoff from the Minimal Advanced Treatment of Surface Interaction Runoff (MATSIRO; Takata *et al.*, 2003), simulated by Kim *et al.* (2009), was used. Other parameters were estimated to be  $b_{min} = 1.0$ ,  $c_b = 0.1$ , and  $p_b = 0.5$ .

15 **Table S1: Secondary Flags used in the AltiMaP. Here large and small river are with respective to each river section. The upstream catchment area was used to define the small and large rivers.**

| Main Flags | Secondary Flag | Description                                                                                                              |
|------------|----------------|--------------------------------------------------------------------------------------------------------------------------|
|            | 11             | VS was found on the river centerline                                                                                     |
| 10         | 12             | VS was found on the river channel but not in the centerline and assigned to the nearest centerline                       |
|            | 13             | VS was found in the unit-catchment mouth                                                                                 |
| 20         | 21             | VS was found in the ground and assigned to the nearest single channel centerline                                         |
|            | 22             | VS was found in the ground near large river channel in in mult-channel river and assigned to the larger river centerline |
| 30         | 31             | VS was found in the ground near small river channel in mult-channel river and assigned to the large river centerline     |
|            | 32             | VS was found in bifurcating channel and assigned to the large river centerline                                           |
| 40         | 40             | VS was found in the ocean and assigned to nearest river channel                                                          |

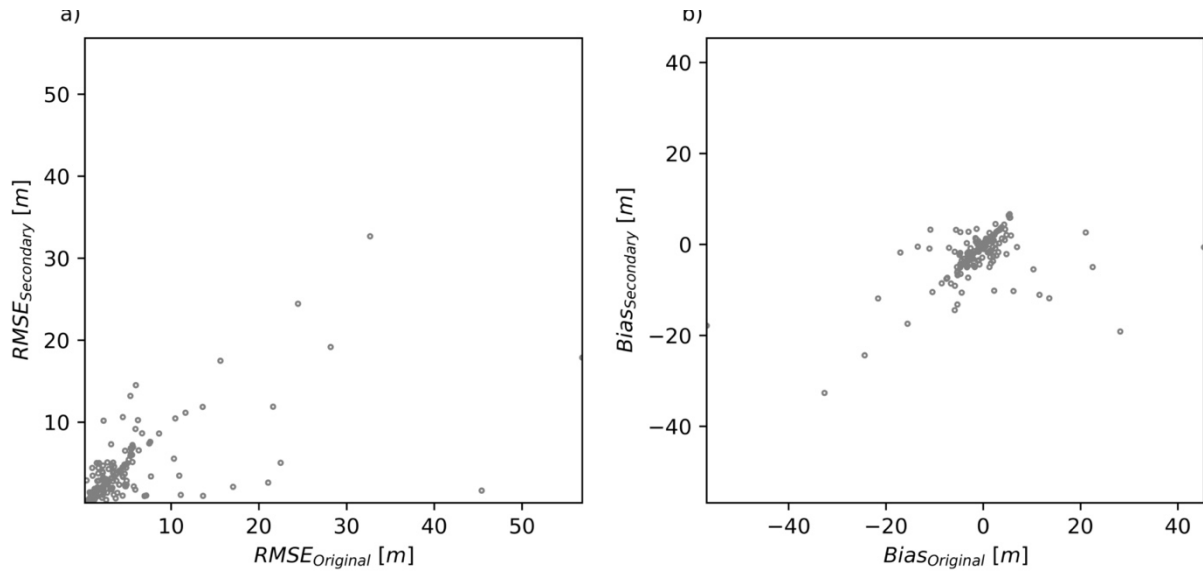

Figure S2: Comparison of root mean squared error (RMSE: a) and bias (b) for Original and Secondary allocations.

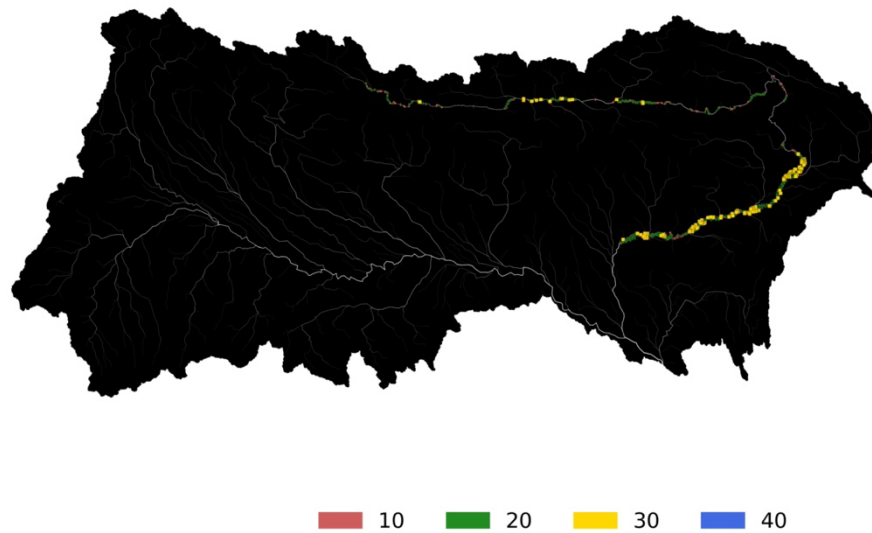

Figure S1: AltiMaP allocation flags for the CryoSat-2 data provided by Schneider et al., (2017). Here each Cryostat-2 observations has been considered as a VS to allocate into MERIT Hydro because of the drifting orbit of CryoSat-2.

#### Reference:

- Kim, H., Yeh, P. J. F., Oki, T. and Kanae, S.: Role of rivers in the seasonal variations of terrestrial water storage over global basins, *Geophys. Res. Lett.*, 36(17), 2–6, doi:10.1029/2009GL039006, 2009.
- 20 Schneider, R., Nygaard Godiksen, P., Villadsen, H., Madsen, H. and Bauer-Gottwein, P.: Application of CryoSat-2 altimetry data for river analysis and modelling, *Hydrol. Earth Syst. Sci.*, 21(2), 751–764, doi:10.5194/hess-21-751-2017, 2017.
- Takata, K., Emori, S. and Watanabe, T.: Development of the minimal advanced treatments of surface interaction and runoff, *Glob. Planet. Change*, 38(1–2), 209–222, doi:10.1016/S0921-8181(03)00030-4, 2003.
- 25 Yamazaki, D., Kanae, S., Kim, H. and Oki, T.: A physically based description of floodplain inundation dynamics in a global river routing model, *Water Resour. Res.*, 47(4), 1–21, doi:10.1029/2010WR009726, 2011.
- Zhou, X., Revel, M., Modi, P., Shiozawa, T. and Yamazaki, D.: Correction of River Bathymetry Parameters Using the Stage–Discharge Rating Curve, *Water Resour. Res.*, 58(4), 1–26, doi:10.1029/2021WR031226, 2022.
